# Supplementary material for: Associations between low HDL, sex and cardiovascular risk markers are substantially different in sub-Saharan Africa and the UK: analysis of four population studies
Source: PubMed Central journal article supplement — BMJ Glob Health. 2021 May 20;6(5):e005222. doi: 10.1136/bmjgh-2021-005222 (PMC8141440; doi:10.1136/bmjgh-2021-005222), 2021-05-20

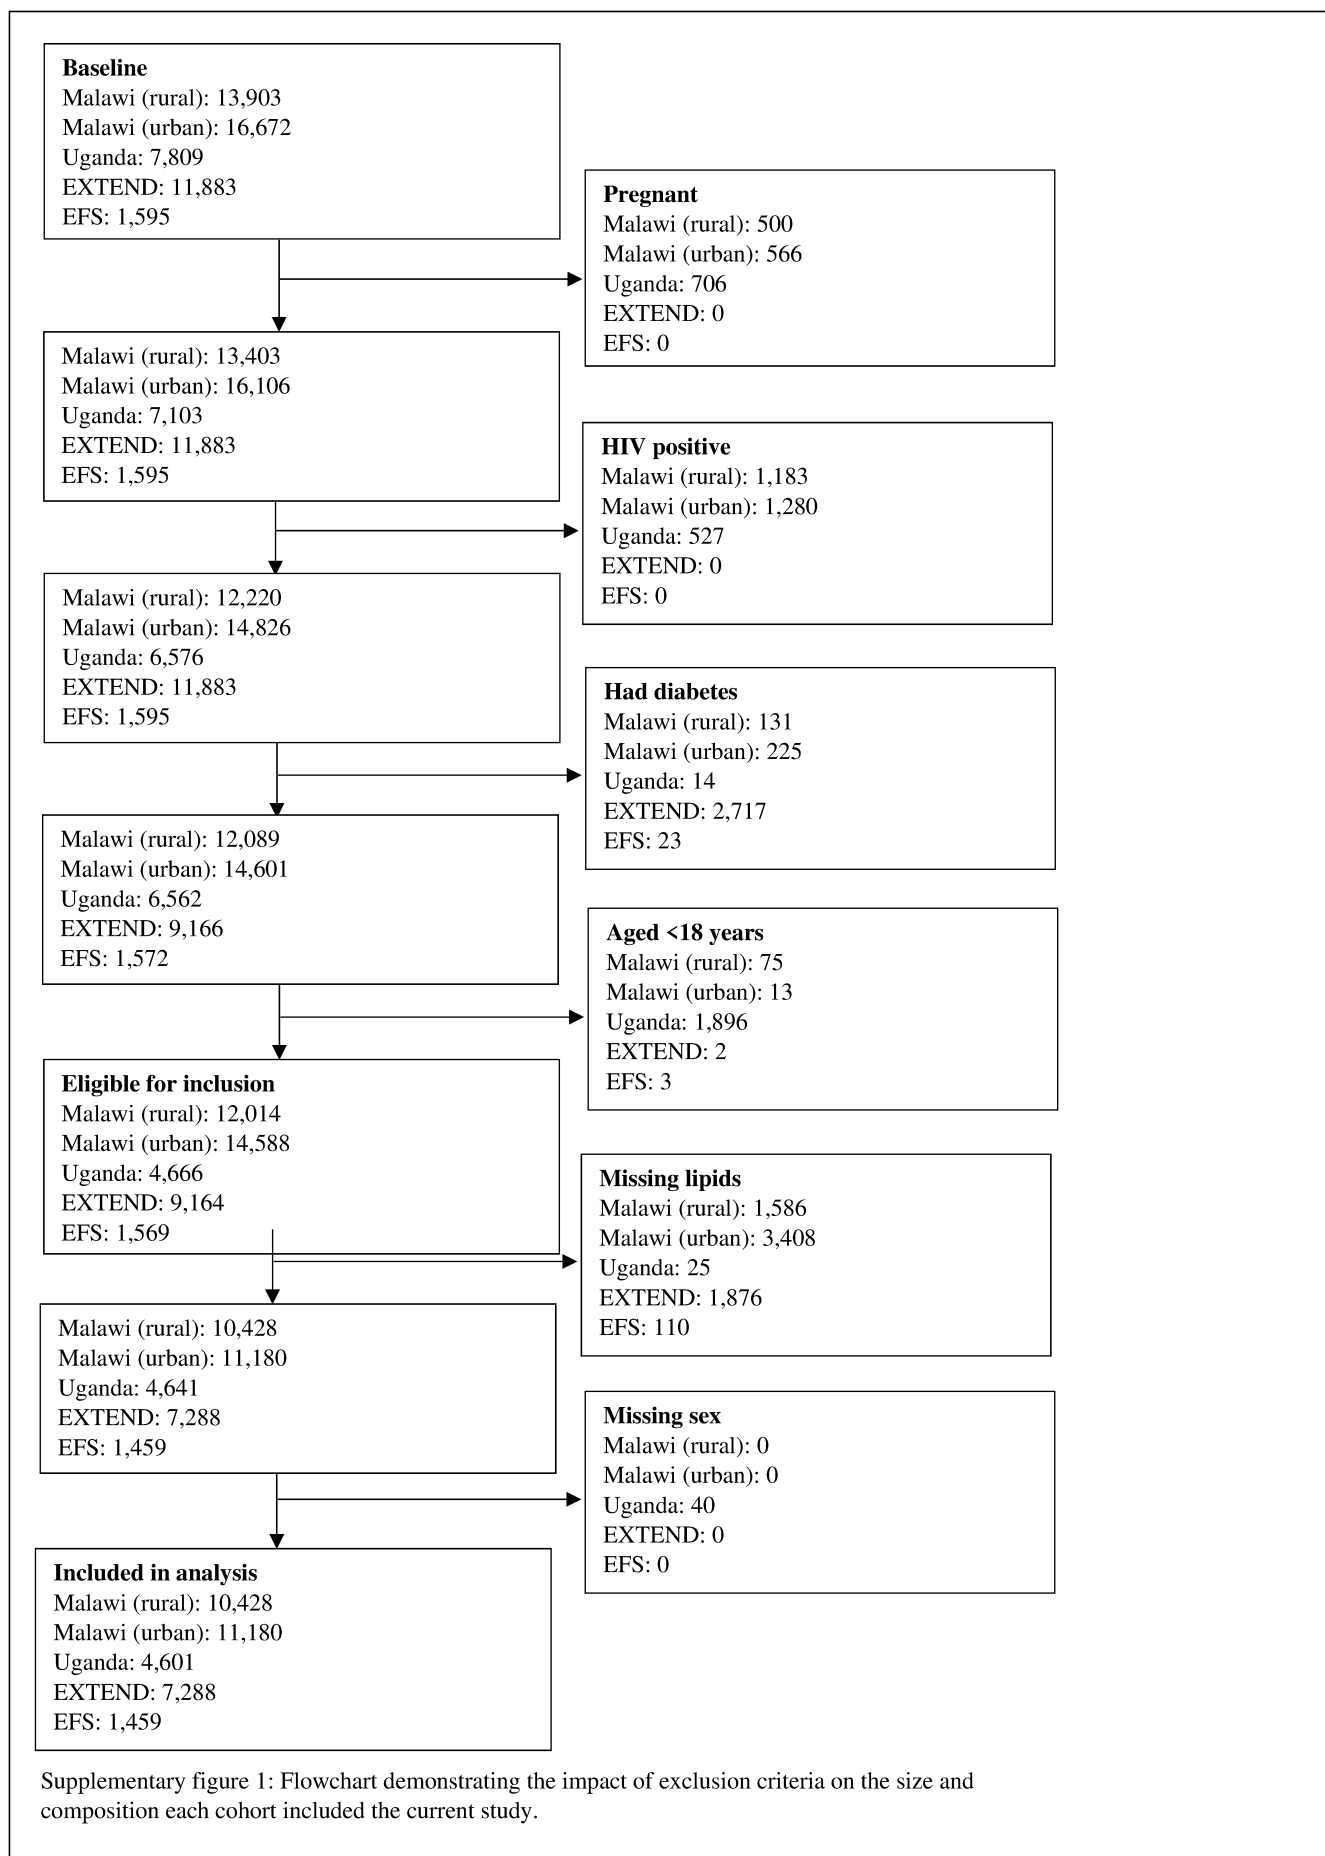

| Supplementary table 1: Age and BMI of participants with complete and missing lipid and sex data |                |                |                |                |                |
|-------------------------------------------------------------------------------------------------|----------------|----------------|----------------|----------------|----------------|
|                                                                                                 | Malawi (rural) | Malawi (urban) | Uganda         | EXTEND         | EFS            |
| Complete lipids and sex data                                                                    |                |                |                |                |                |
| n                                                                                               | 10,428         | 11,180         | 4,601          | 7,288          | 1,458          |
| Age (years)                                                                                     | 34<br>(25, 47) | 29<br>(22, 37) | 40<br>(27, 54) | 56<br>(43, 66) | 32<br>(29, 35) |
| BMI (kg/m <sup>2</sup> )                                                                        | 22<br>(22, 23) | 24<br>(24, 24) | 22<br>(22, 22) | 26<br>(26, 26) | 26<br>(25, 26) |
| Missing lipids data                                                                             |                |                |                |                |                |
| n                                                                                               | 1,586          | 3,407          | 25             | 1,639          | 100            |
| Age (years)                                                                                     | 33<br>(24, 52) | 28<br>(22, 36) | 45<br>(36, 72) | 52<br>(41, 65) | 32<br>(29, 36) |
| BMI (kg/m <sup>2</sup> )                                                                        | 22<br>(22, 22) | 23<br>(23, 23) | 21<br>(19, 22) | 26<br>(26, 26) | 27<br>(26, 28) |
| Missing sex data                                                                                |                |                |                |                |                |
| n                                                                                               | 0              | 0              | 40             | 0              | 0              |
| Age (years)                                                                                     | -              | -              | 37<br>(28, 53) | -              | -              |
| BMI (kg/m <sup>2</sup> )                                                                        | -              | -              | 21<br>(20, 22) | -              | -              |
| Age is median (IQR) and BMI is geometric mean (95% CI)                                          |                |                |                |                |                |

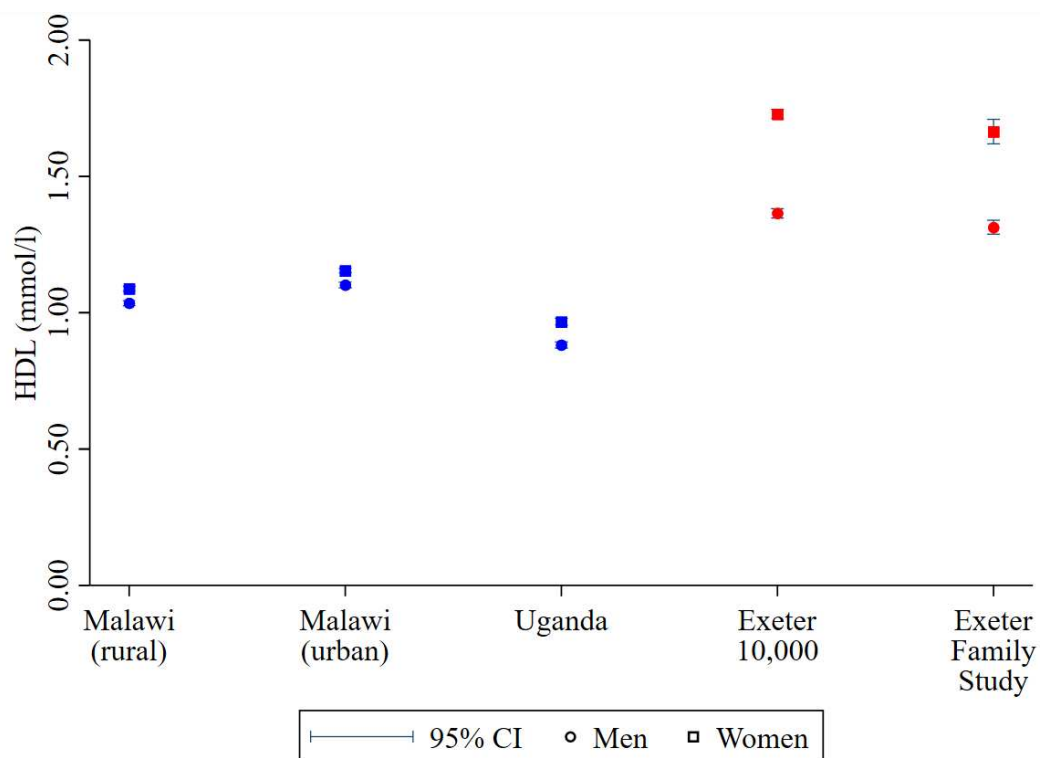

Supplementary figure 2: Geometric mean HDL for each cohort, adjusted to the median age of the participants in the Malawian cohort.

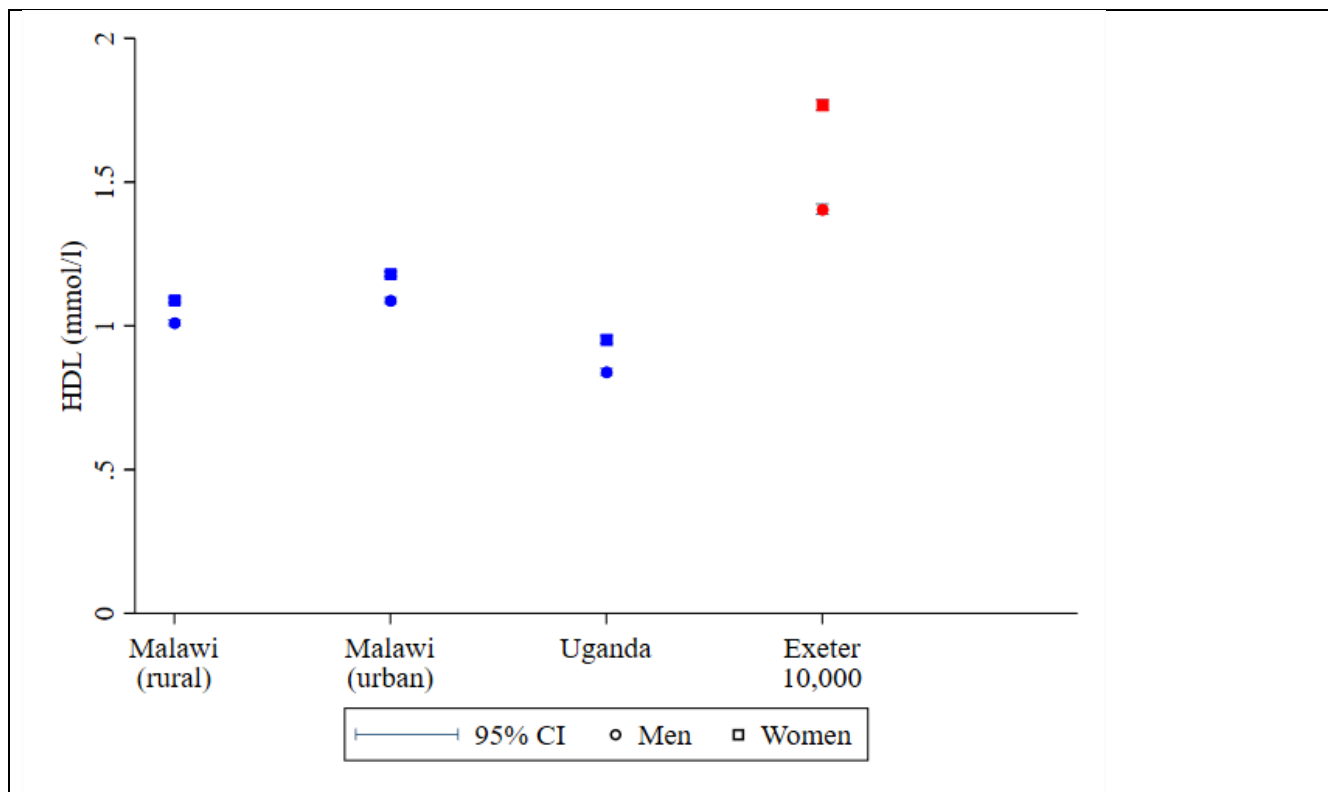

Supplementary figure 3: Geometric mean HDL for each cohort, adjusted to the median age of the participants in the Malawian cohort, and for smoking status and alcohol consumption.

Supplementary table 2: Linear regression with HDL as the dependent variable and measures of socioeconomic status as independent variables.

| Relationship between socio-economic status and HDL | Men                             | Women                          |
|----------------------------------------------------|---------------------------------|--------------------------------|
| Malawi (rural): Household possession score         | 0.00 (-0.00, 0.00)<br>p=0.789   | 0.00 (-0.00, 0.01)<br>p=0.117  |
| Malawi (urban): Household possession score         | -0.00 (-0.01, -0.00)<br>p=0.039 | 0.01 (0.01, 0.01)<br>p<0.0001  |
| Uganda: Socio-economic score                       | 0.00 (-0.01, 0.02)<br>p=0.774   | 0.03 (0.01, 0.04)<br>p<0.0001  |
| Exeter 10,000: Index of multiple deprivation       | 0.00 (-0.00, 0.00)<br>p=0.475   | 0.00 (0.00, 0.00)<br>p=0.001   |
| Exeter Family Study: Index of multiple deprivation | -0.00 (-0.00, 0.00)<br>p=0.163  | -0.00 (-0.01, 0.00)<br>p=0.124 |

Supplementary table 3:  $\beta$ -coefficients (95% CI) for linear regression analysis of the relationships between HDL and CVD risk factors, among men and women in the UK and sub-Saharan Africa.

|                                                          | UK                         |                            | Sub-Saharan Africa         |                            |
|----------------------------------------------------------|----------------------------|----------------------------|----------------------------|----------------------------|
|                                                          | Men                        | Women                      | Men                        | Women                      |
| <b>n</b>                                                 | 3,598                      | 5,148                      | 10,701                     | 15,515                     |
| <b>BMI</b>                                               | n=3,591                    | n=5,145                    | n=10,667                   | n=15,454                   |
| Unadjusted                                               | -0.034<br>(-0.037, -0.031) | -0.031<br>(-0.034, -0.029) | -0.007<br>(-0.009, -0.005) | -0.004<br>(-0.005, -0.003) |
| Adjusted for age and smoking status                      | -0.036<br>(-0.039, -0.033) | -0.034<br>(-0.036, -0.031) | -0.007<br>(-0.009, -0.004) | -0.004<br>(-0.005, -0.003) |
| Adjusted for age, smoking status and alcohol consumption | -0.038<br>(-0.042, -0.034) | -0.034<br>(-0.036, -0.031) | -0.006<br>(-0.008, -0.003) | -0.004<br>(-0.005, -0.003) |
| <b>Non-HDL</b>                                           | n=3,598                    | n=5,148                    | n=10,701                   | n=15,515                   |
| Unadjusted                                               | -0.089                     | -0.069                     | 0.046                      | 0.041                      |

|                                                          |                    |                    |                    |                    |
|----------------------------------------------------------|--------------------|--------------------|--------------------|--------------------|
|                                                          | (-0.100, -0.078)   | (-0.081, -0.057)   | (0.038, 0.054)     | (0.036, 0.047)     |
| Adjusted for age and smoking status                      | n= 3,545<br>-0.088 | n= 4,641<br>-0.116 | n=10,699<br>0.041  | n=15,510<br>0.046  |
| Adjusted for age, smoking status and alcohol consumption | n=2,646<br>-0.089  | n=4,641<br>-0.116  | n=10,699<br>0.043  | n=15,510<br>0.046  |
|                                                          | (-0.103, -0.076)   | (-0.128, -0.103)   | (0.035, 0.051)     | (0.040, 0.052)     |
| <b>Triglycerides</b>                                     | n=3,598            | n=5,148            | n=10,701           | n=15,515           |
| Unadjusted                                               | -0.243             | -0.327             | -0.075             | -0.119             |
| Adjusted for age and smoking status                      | n=3,545<br>-0.241  | n=4,641<br>-0.381  | n=10,699<br>-0.090 | n=15,510<br>-0.148 |
|                                                          | (-0.257, -0.226)   | (-0.404, -0.358)   | (-0.101, -0.080)   | (-0.158, -0.137)   |
| Adjusted for age, smoking status and alcohol consumption | n=2,646<br>-0.269  | n=4,641<br>-0.381  | n=10,699<br>-0.096 | n=15,510<br>-0.149 |
|                                                          | (-0.288, -0.250)   | (-0.404, -0.358)   | (-0.107, -0.086)   | (-0.159, -0.138)   |

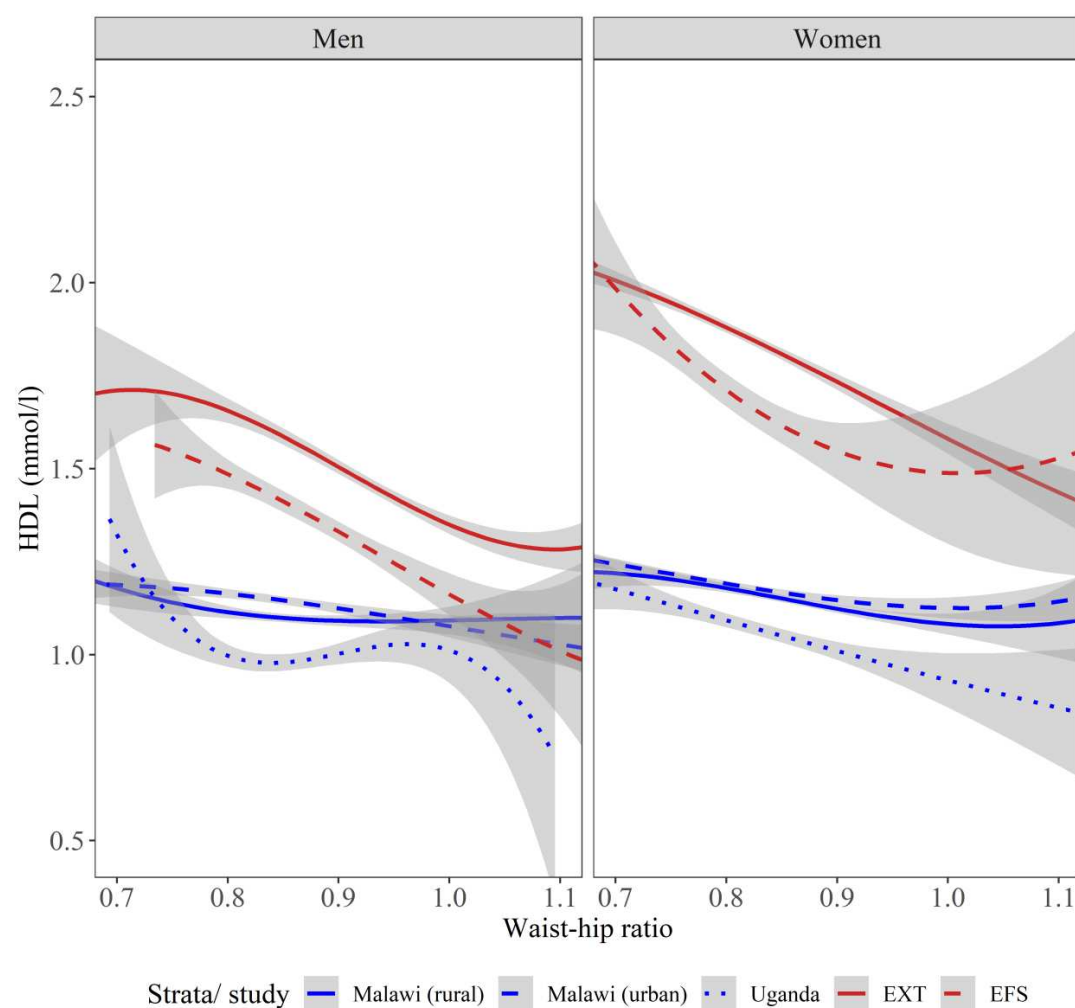

Supplementary figure 4: HDL at each level of waist-hip ratio for each cohort.

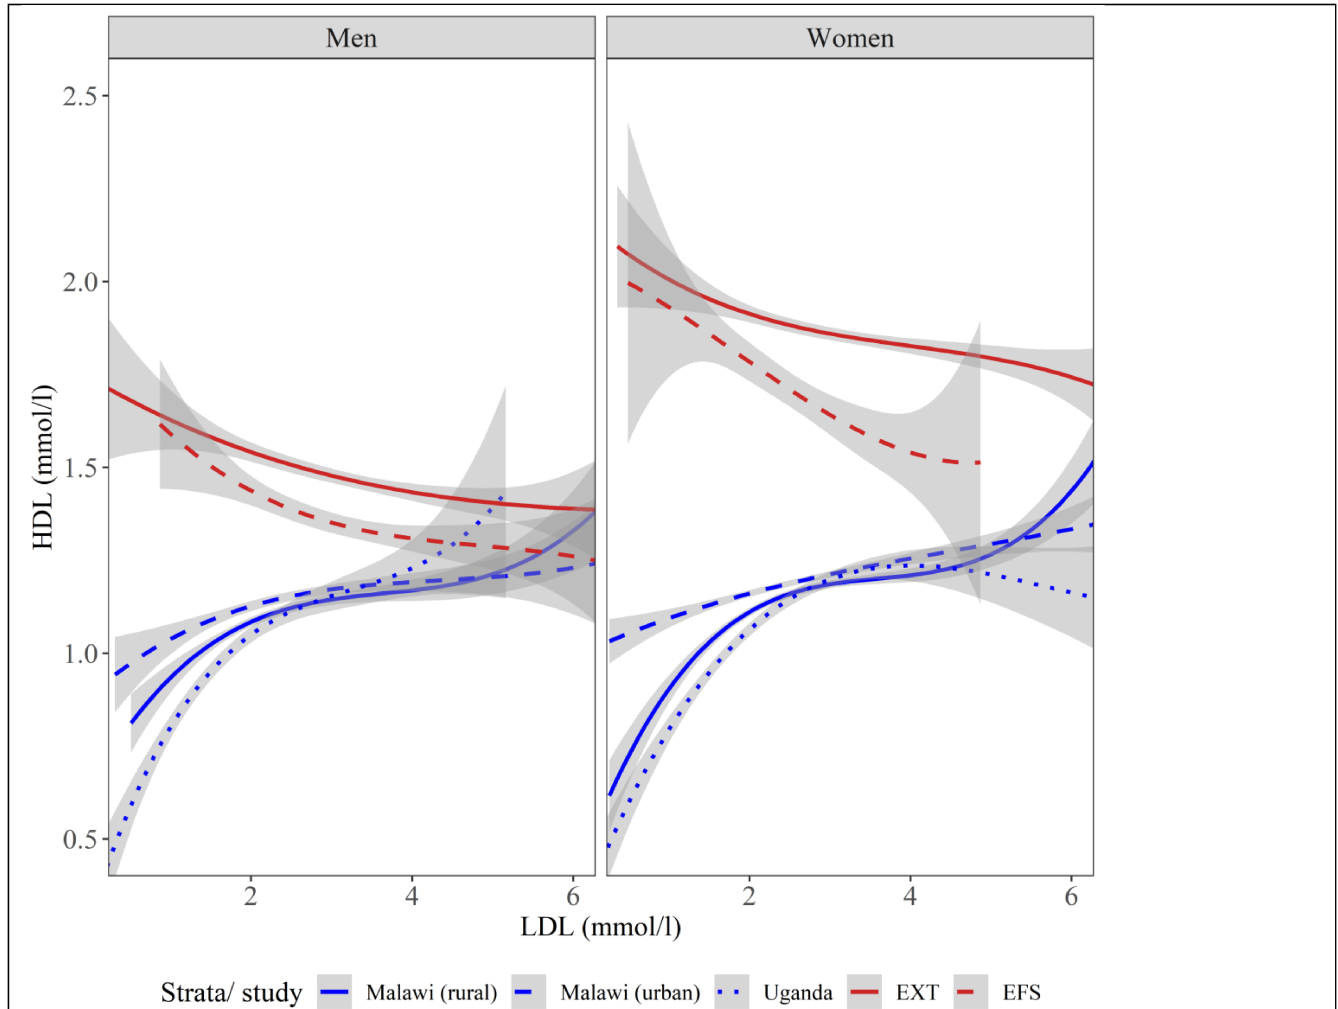

Supplementary Figure 5: Spline regression showing HDL at each level of LDL for each cohort.

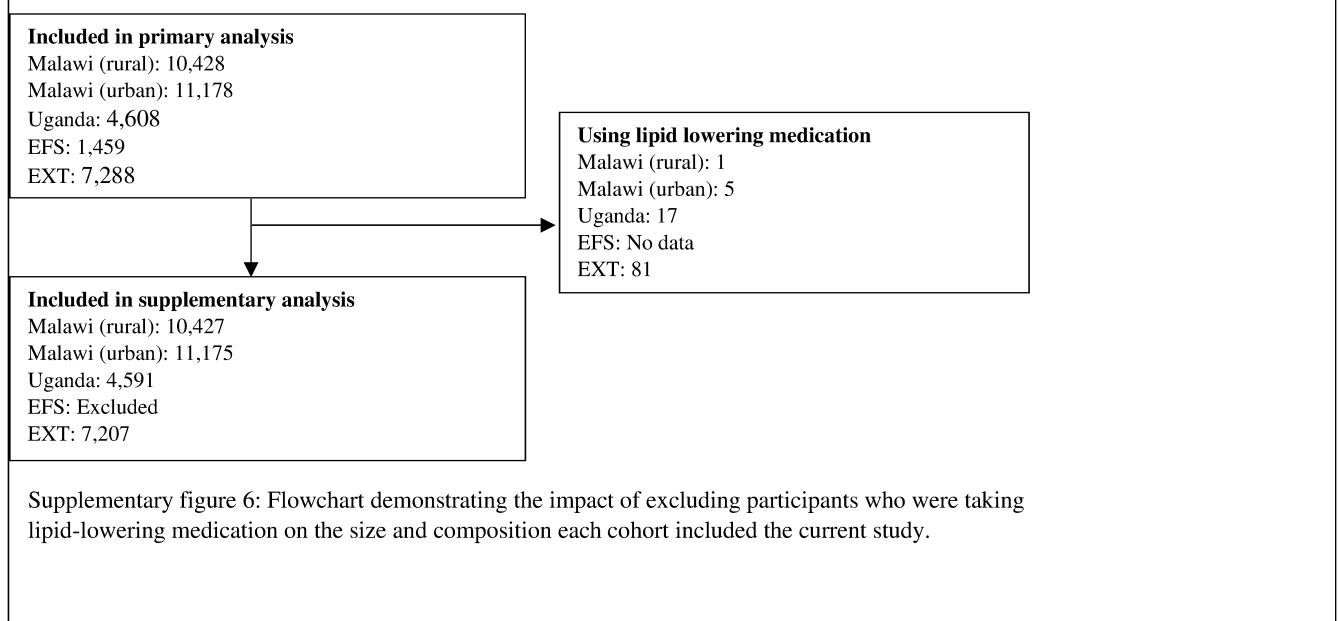

Supplementary figure 6: Flowchart demonstrating the impact of excluding participants who were taking lipid-lowering medication on the size and composition each cohort included the current study.

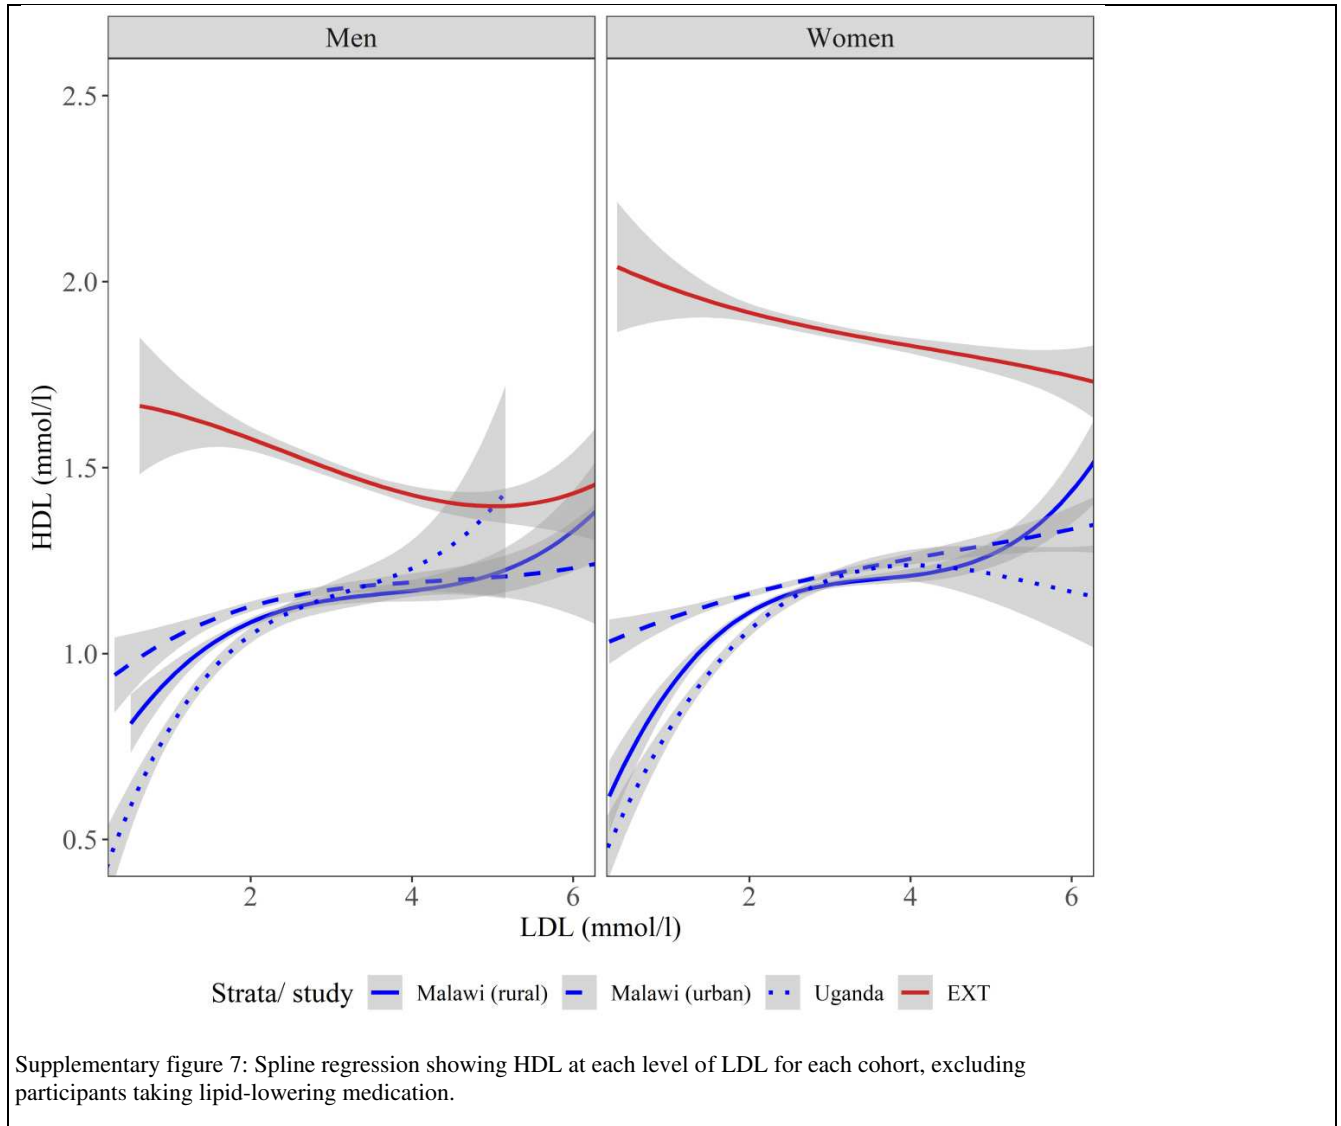

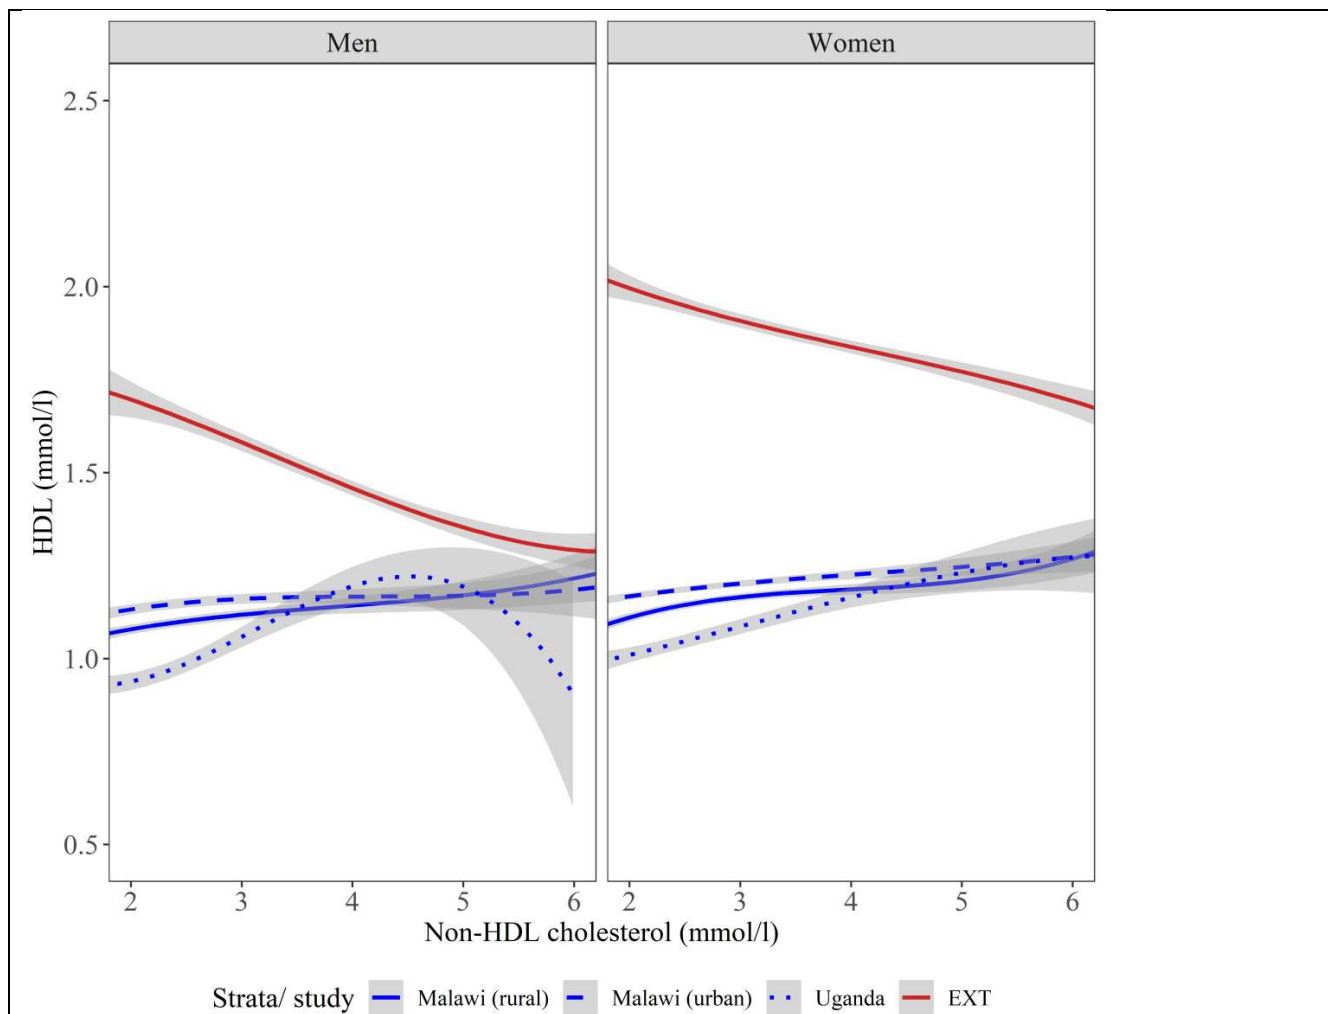

Supplementary figure 8: HDL at each level of non-HDL for each cohort, excluding those using lipid lowering medication.

Supplementary table 4:  $\beta$ -coefficients (95% CI) for linear regression analysis of the relationships between HDL and CVD risk factors, among men and women in the UK and sub-Saharan Africa, excluding individuals who were using lipid lowering medication

|                | UK                                    |                                       | Sub-Saharan Africa                  |                                     |
|----------------|---------------------------------------|---------------------------------------|-------------------------------------|-------------------------------------|
|                | Men                                   | Women                                 | Men                                 | Women                               |
| <b>n</b>       | 3,558                                 | 5,107                                 | 10,692                              | 15,501                              |
| <b>Non-HDL</b> | n=3,209                               | n=4,806                               | n=10,692                            | n=15,501                            |
| Unadjusted     | -0.904<br>(-0.107, -0.082)            | -0.067<br>(-0.079, -0.055)            | 0.046<br>(0.038, 0.054)             | 0.041<br>(0.036, 0.047)             |
| Adjusted       | n=2,257<br>-0.110<br>(-0.125, -0.095) | n=4,353<br>-0.130<br>(-0.143, -0.116) | n=10,690<br>0.043<br>(0.035, 0.051) | n=15,496<br>0.046<br>(0.040, 0.052) |

Adjusted analyses are adjusted for age, smoking status and alcohol consumption.

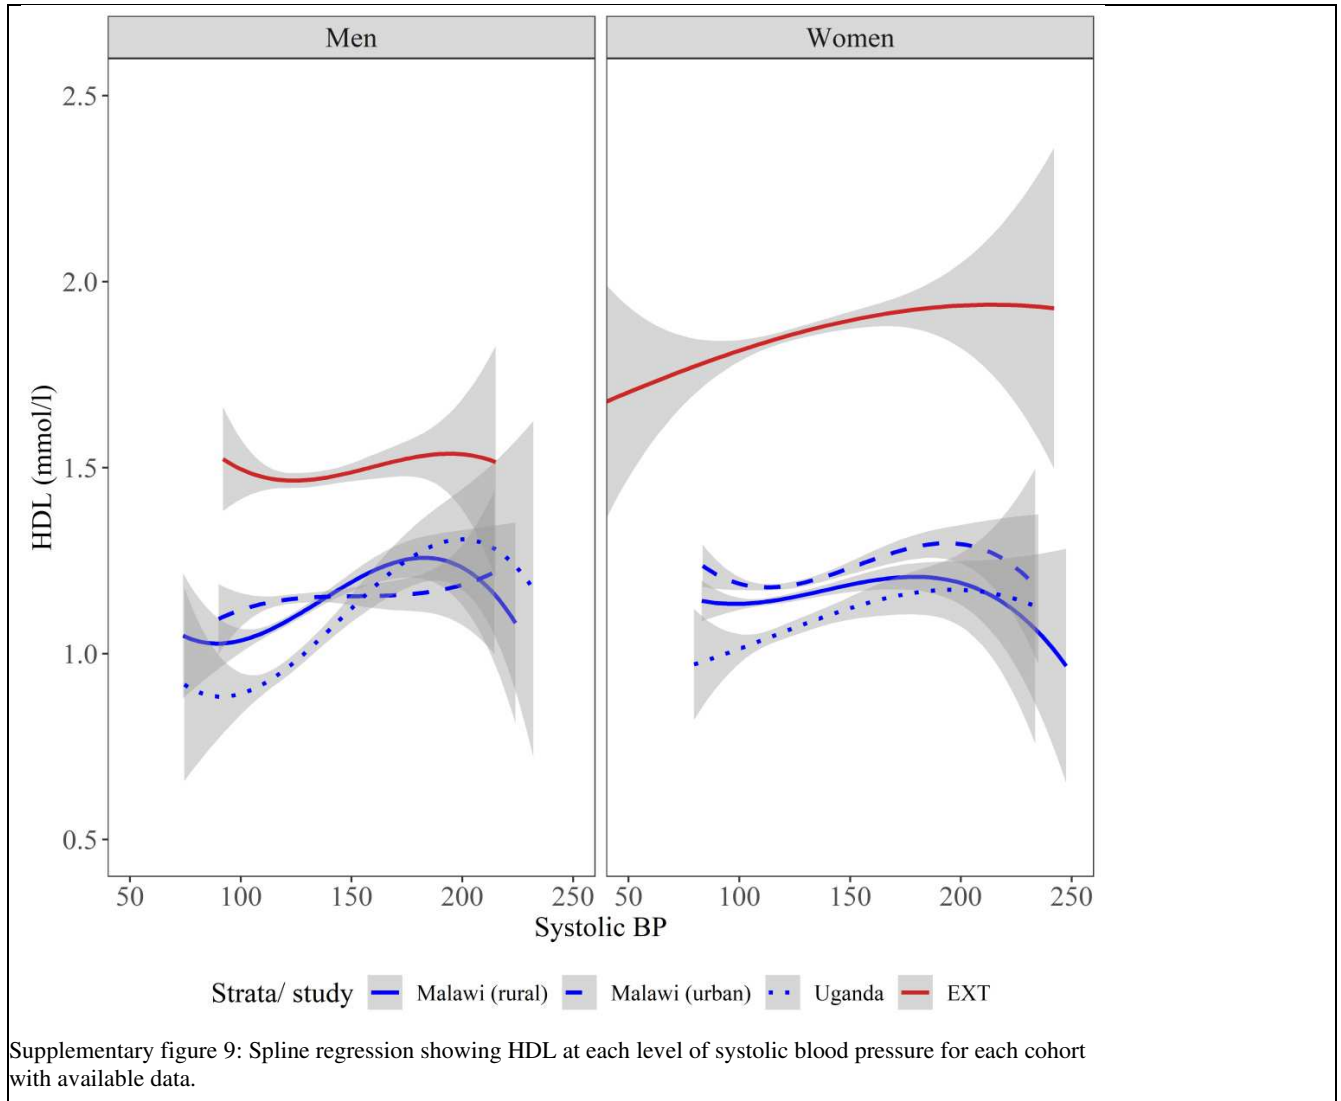

Supplement: bmjgh-2021-005222supp001.pdf [file bmjgh-2021-005222supp001.pdf]
